# Supplementary material for: In situ synthesis of gold nanoclusters in hydrogels for the capillary based portable fluorescence analysis of hypochlorite in environmental samples
Source: Royal Society of Chemistry journal article supplement (doi:10.1039/d3en00247k), 2023-01-01
Supplement: d3en00247k1.pdf [file d3en00247k1.pdf]

*Supporting information*

***In-Situ* Synthesis of Gold Nanoclusters in Hydrogels Enables  
Capillary-Based Portable Fluorescence Analysis of Hypochlorite in  
Environmental Samples**

Cui Zheng Peng,<sup>†,♦</sup> Hang Zhang,<sup>†,♦</sup> Ningning Pi,<sup>‡</sup> Xinyu Li,<sup>‡</sup> Qingling Yang,<sup>‡</sup> Hao Lin  
Zou,<sup>†</sup> Hong Qun Luo,<sup>†</sup> Nian Bing Li,<sup>†</sup> and Bang Lin Li<sup>\*,†</sup>

<sup>†</sup> Key Laboratory of Luminescence Analysis and Molecular Sensing (Southwest University), Ministry of Education, School of Chemistry and Chemical Engineering, Southwest University, Chongqing 400715, P. R. China.

<sup>‡</sup> Key Laboratory of Organic Pollutants in Environmental Chemical Behavior and Ecological Toxicology of Chongqing & Chongqing Ecological and Environmental Monitoring Center, Chongqing, 401147, P. R. China

<sup>♦</sup> C.Z.P. and H.Z. contributed equally to this work.

\*Email address: B. L. Li ([chemlibl@swu.edu.cn](mailto:chemlibl@swu.edu.cn))

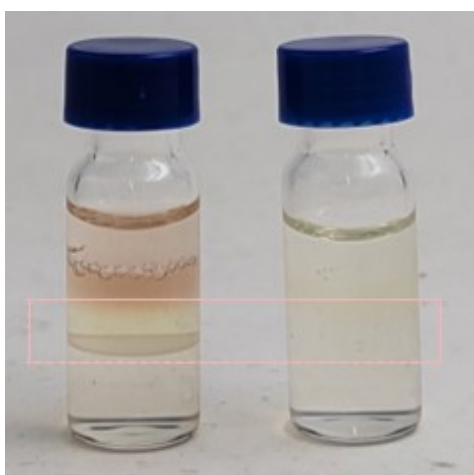

**Figure S1.** The gel base in the left vial is doped with H<sub>AuCl</sub><sub>4</sub> and BSA, and the gel base in the right vial is doped with BSA only. After incubation with an alkaline solution (pH=12.8) at 60 °C for 30 min, this phenomenon in the sample bottle occurred.

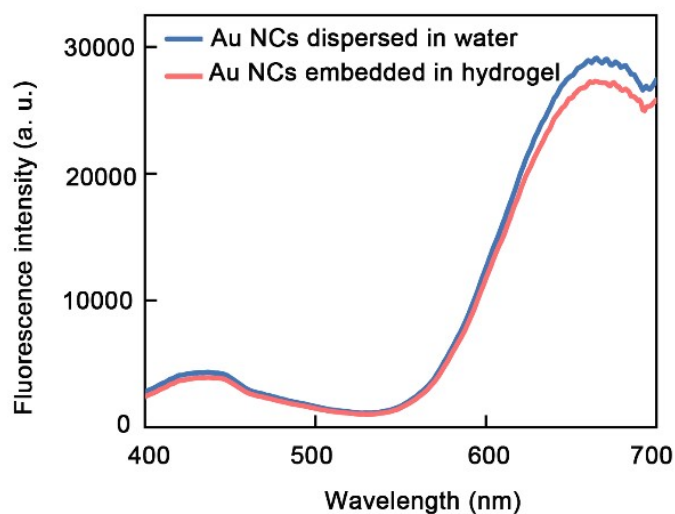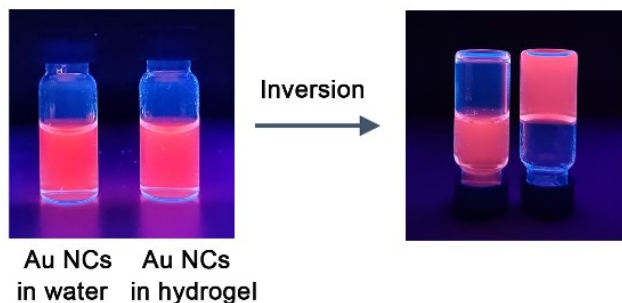

**Figure S2.** The fluorescence emission spectra (above panel) and photographs (below panel) of the Au NCs aqueous solution and Au NCs embedded in hydrogel under the excitation of 360 nm.

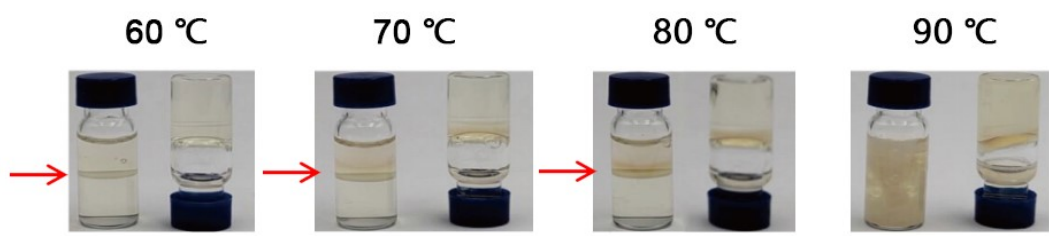

**Figure S3.** The nano-staining hydrogels were treated at different temperatures for 1 h. The results indicate that the boundary between the aqueous solution and the hydrogel disappears at the temperature of 90 °C.

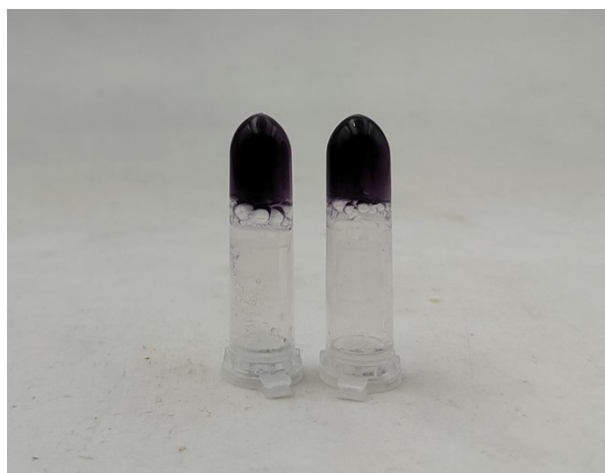

**Figure S4.** The nanoparticles appeared in reaction hydrogels at room temperature for 20 days without presence of  $\text{OH}^-$ .

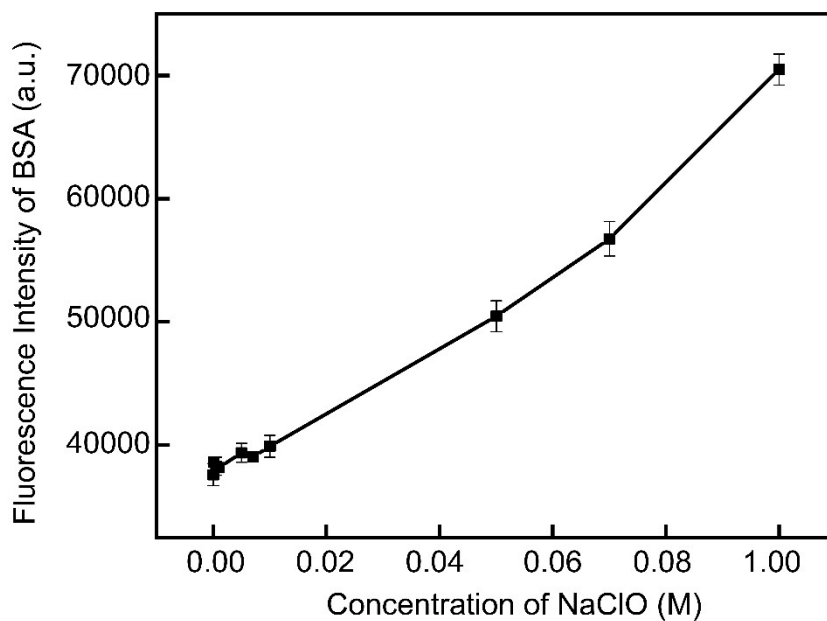

**Figure S5.** After mixing a specific concentration of BSA aqueous solution with a particular concentration gradient of NaClO solution, the change trends of fluorescence intensity of the mixed solutions at 425 nm.

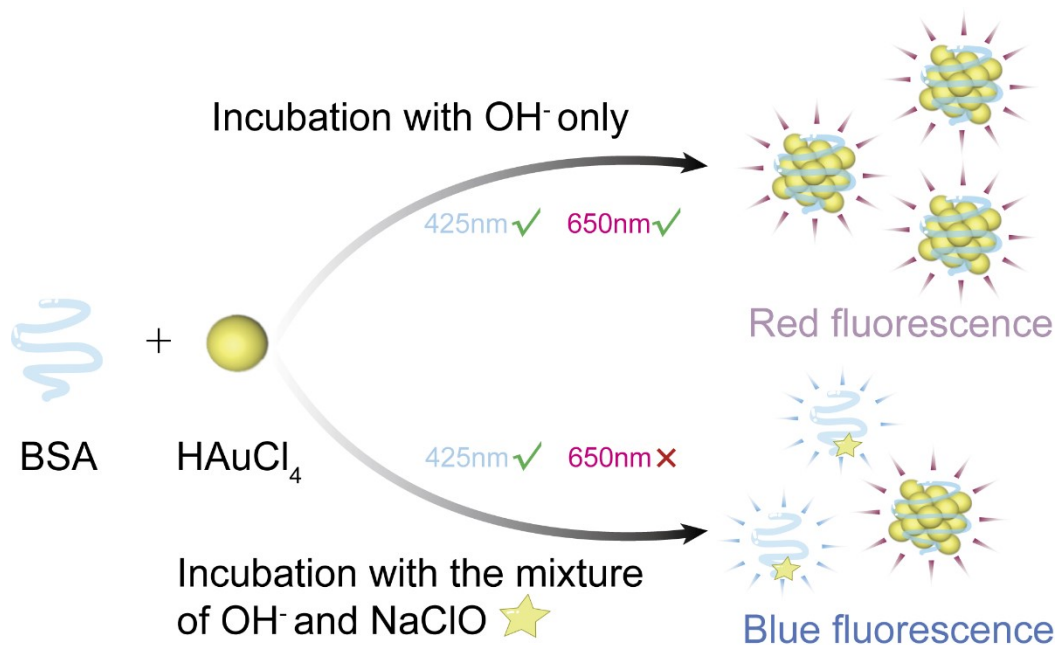

**Figure S6.** The supplementary mechanism of fluorescence responses to high-concentration ClO<sup>-</sup> using the fluorescent Au NCs staining hydrogels sensory strategy.

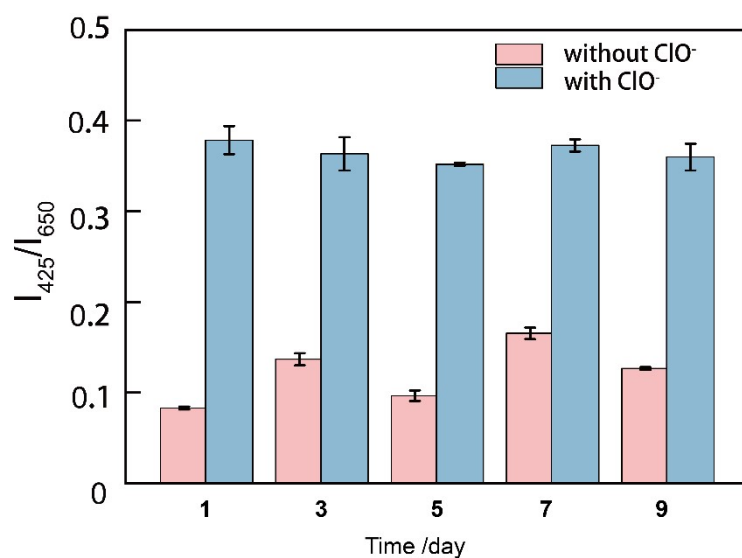

**Figure S7.** The fluorescence responses of the nano-staining hydrogels in the absence and presence of  $\text{ClO}^-$  (5.0 mM) after the loading hydrogels had been prepared for different days.

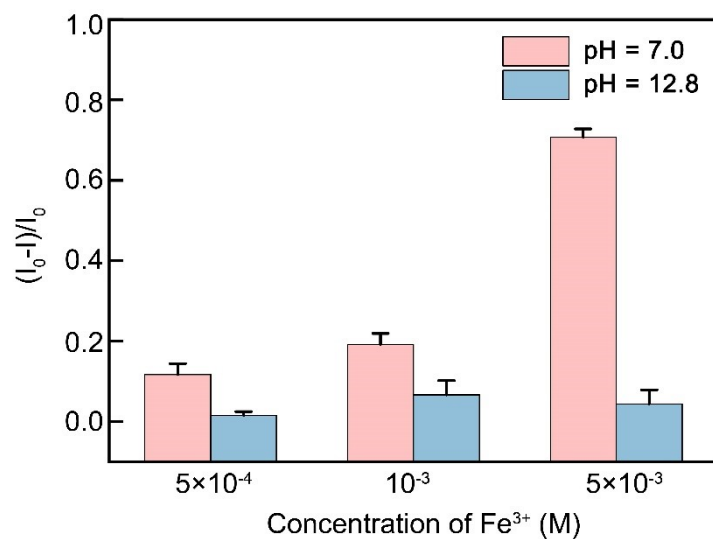

**Figure S8.** The fluorescence changes of pre-synthetic BSA-Au NCs to different concentrations of  $\text{Fe}^{3+}$  ions in various pH conditions.

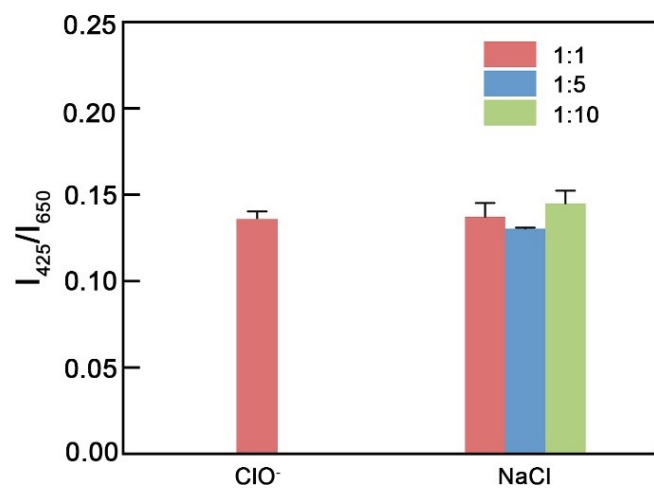

**Figure S9.** The fluorescence responses of Au NCs-staining hydrogels to  $\text{ClO}^-$  in the presence of NaCl with different concentration ratios ( $\text{ClO}^-$ : NaCl).
